# Supplementary material
Source: HighWire-hosted journal article supplement (https://gut.bmj.com/content/70/6/1023)

Supplementary Figure 3

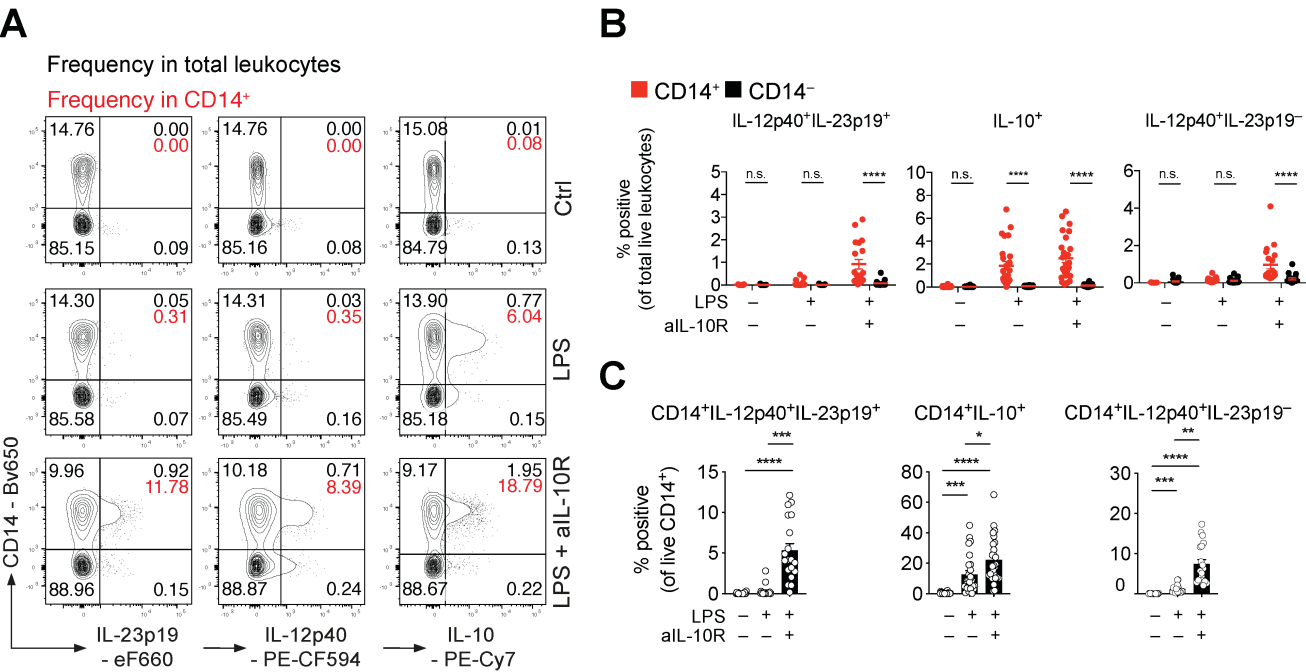

Supplement: inline-supplementary-material-7 [file inline-supplementary-material-7.pdf]
